# Supplementary material for: Mammographic Breast Density and Breast Cancer Molecular Subtypes: The Kenyan-African Aspect
Source: Hindawi journal article supplement (doi:10.1155/2018/6026315), 2018-01-01

**Supplementary Figure 1: Distribution of mammographic breast density (MBD) measurements by age including (A) dense area, (B) non-dense area and (C) breast area**

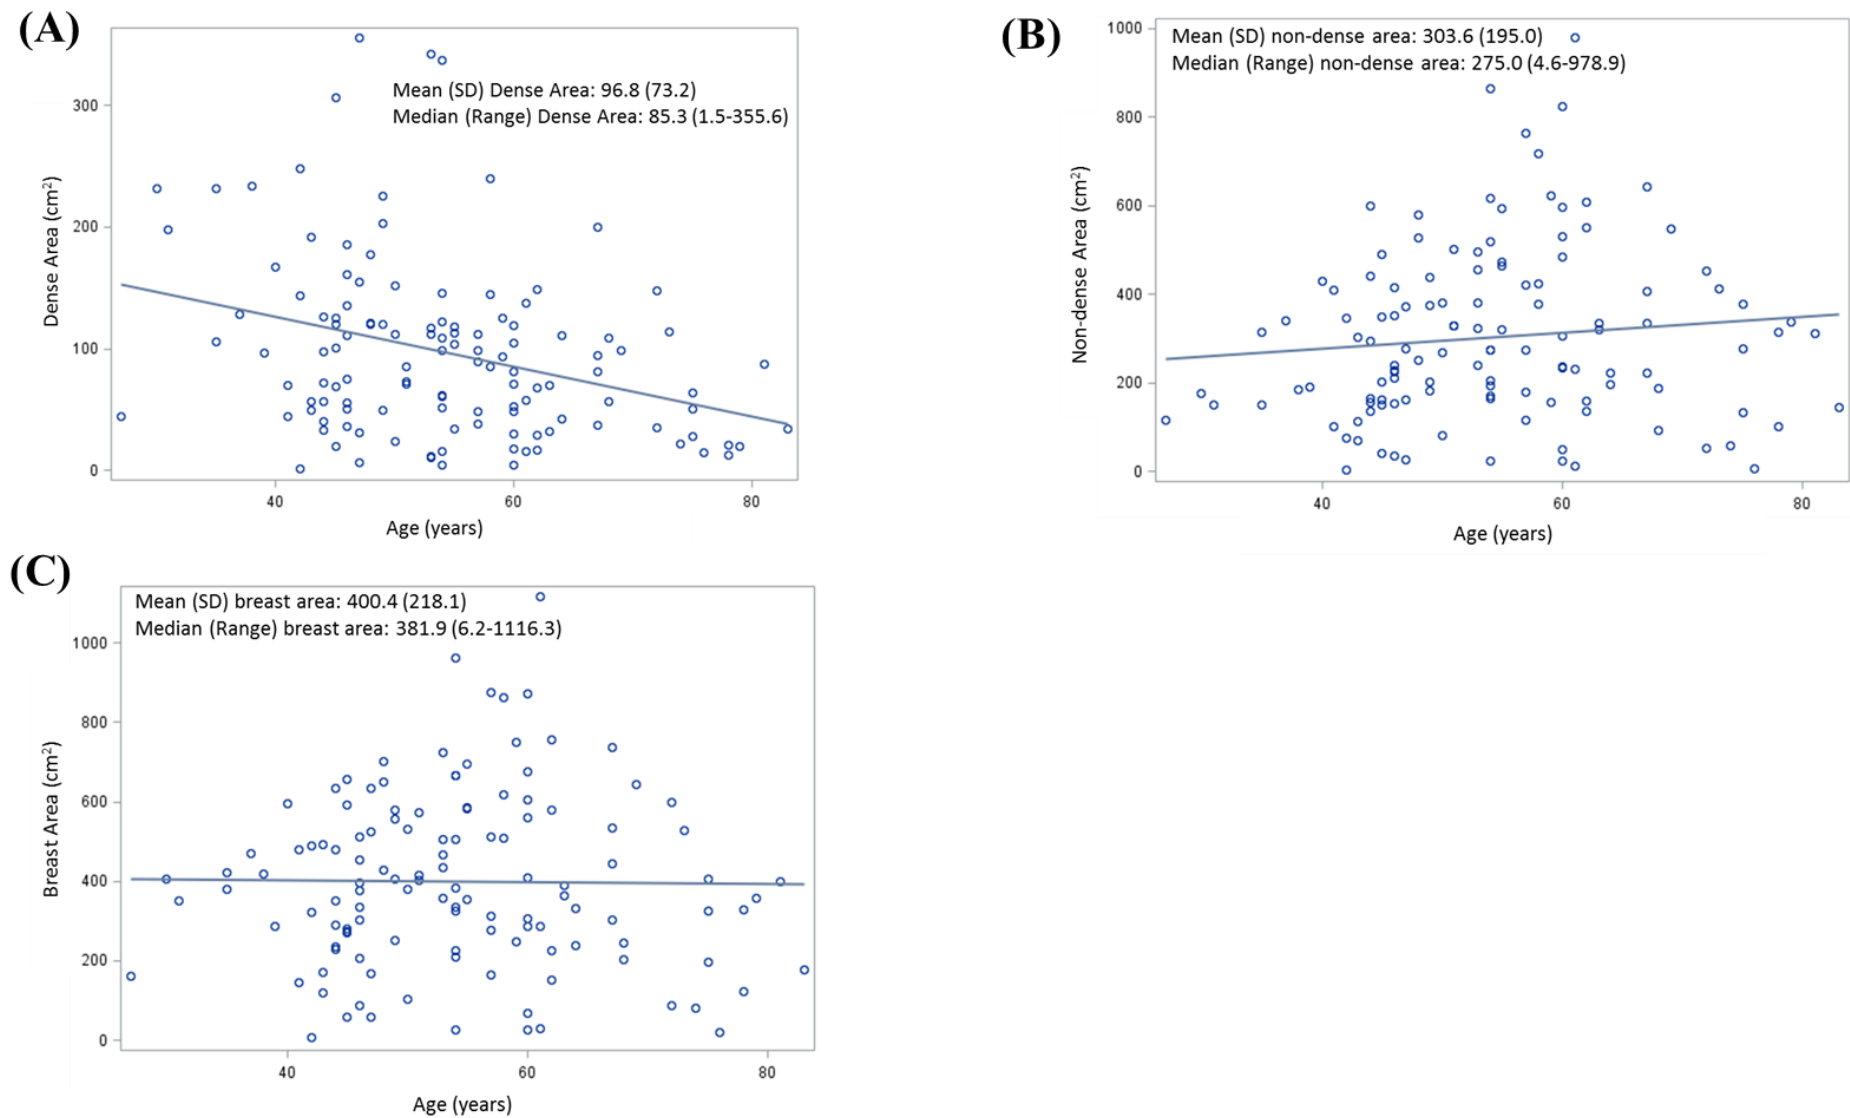

Supplement: f1 [file 6026315.f1.pdf]
